# Supplementary material for: Graphene oxide and oxidized carbon nanodiscs as biomedical scaffolds for the targeted delivery of quercetin to cancer cells
Source: Royal Society of Chemistry journal article supplement (doi:10.1039/d3na00966a), 2024-01-01
Supplement: d3na00966a1.pdf [file d3na00966a1.pdf]

## Supplementary Information

### **Graphene oxide and oxidized carbon nanodiscs as biomedical scaffolds for the targeted delivery of quercetin to cancer cells**

Panagiota Zygouri, Grigorios Tsiodoulos, Marina Angelidou, Eirini Papanikolaou, Antrea-Maria Athinodorou, Yannis V .Simos, Konstantinos Spyrou, Mohammed Subrati, Antonios Kouloumpis, Angela Kaloudi, Georgios Asimakopoulos, Konstantinos Tsamis, Dimitrios Peschos, Patra Vezyraki, Vasileios Ragos, Dimitrios P. Gournis

**Table S1.** Lorentzian peak fitting parameters for the first-order Raman bands of graphite, GO, and GO\_Q.  $\Delta\tilde{\nu}$  = Raman shift/band position; FWHM = Full width at half maximum;  $I$  = Band intensity.

| Sample   | First-order Raman bands                                                                 |                                                                                          |                                                                                         |                                                                                         |                                                                                         |
|----------|-----------------------------------------------------------------------------------------|------------------------------------------------------------------------------------------|-----------------------------------------------------------------------------------------|-----------------------------------------------------------------------------------------|-----------------------------------------------------------------------------------------|
|          | Second-order Raman bands                                                                |                                                                                          |                                                                                         |                                                                                         |                                                                                         |
|          | D*                                                                                      | D                                                                                        | D''                                                                                     | G                                                                                       | D'                                                                                      |
| Graphite | -                                                                                       | $\Delta\tilde{\nu} = 1352 \text{ cm}^{-1}$<br>FWHM = 34 $\text{cm}^{-1}$<br>$I = 2401$   | -                                                                                       | $\Delta\tilde{\nu} = 1582 \text{ cm}^{-1}$<br>FWHM = 20 $\text{cm}^{-1}$<br>$I = 17519$ | -                                                                                       |
| GO       | $\Delta\tilde{\nu} = 1127 \text{ cm}^{-1}$<br>FWHM = 684 $\text{cm}^{-1}$<br>$I = 1973$ | $\Delta\tilde{\nu} = 1347 \text{ cm}^{-1}$<br>FWHM = 126 $\text{cm}^{-1}$<br>$I = 25968$ | $\Delta\tilde{\nu} = 1511 \text{ cm}^{-1}$<br>FWHM = 125 $\text{cm}^{-1}$<br>$I = 5485$ | $\Delta\tilde{\nu} = 1575 \text{ cm}^{-1}$<br>FWHM = 58 $\text{cm}^{-1}$<br>$I = 20187$ | $\Delta\tilde{\nu} = 1604 \text{ cm}^{-1}$<br>FWHM = 35 $\text{cm}^{-1}$<br>$I = 11083$ |
| GO_Q     | $\Delta\tilde{\nu} = 1198 \text{ cm}^{-1}$<br>FWHM = 299 $\text{cm}^{-1}$<br>$I = 939$  | $\Delta\tilde{\nu} = 1343 \text{ cm}^{-1}$<br>FWHM = 77 $\text{cm}^{-1}$<br>$I = 19306$  | $\Delta\tilde{\nu} = 1501 \text{ cm}^{-1}$<br>FWHM = 115 $\text{cm}^{-1}$<br>$I = 2924$ | $\Delta\tilde{\nu} = 1573 \text{ cm}^{-1}$<br>FWHM = 50 $\text{cm}^{-1}$<br>$I = 15999$ | $\Delta\tilde{\nu} = 1606 \text{ cm}^{-1}$<br>FWHM = 26 $\text{cm}^{-1}$<br>$I = 5362$  |

**Table S2.**

peak fitting  
for the  
order  
bands of  
GO, and  
= Raman  
position;  
Full width  
maximum;  
intensity.

|          | <b>G' (2D)</b>                                                                          | <b>D+G (D+D')</b>                                                                       | <b>2G (2D')</b>                                                                         |
|----------|-----------------------------------------------------------------------------------------|-----------------------------------------------------------------------------------------|-----------------------------------------------------------------------------------------|
| Graphite | $\Delta\tilde{\nu} = 2708 \text{ cm}^{-1}$<br>FWHM = 69 $\text{cm}^{-1}$<br>$I = 10553$ | -                                                                                       | -                                                                                       |
| GO       | $\Delta\tilde{\nu} = 2682 \text{ cm}^{-1}$<br>FWHM = 297 $\text{cm}^{-1}$<br>$I = 3301$ | $\Delta\tilde{\nu} = 2918 \text{ cm}^{-1}$<br>FWHM = 239 $\text{cm}^{-1}$<br>$I = 4084$ | $\Delta\tilde{\nu} = 3158 \text{ cm}^{-1}$<br>FWHM = 135 $\text{cm}^{-1}$<br>$I = 1023$ |
| GO_Q     | $\Delta\tilde{\nu} = 2677 \text{ cm}^{-1}$<br>FWHM = 214 $\text{cm}^{-1}$<br>$I = 3428$ | $\Delta\tilde{\nu} = 2919 \text{ cm}^{-1}$<br>FWHM = 154 $\text{cm}^{-1}$<br>$I = 2565$ | $\Delta\tilde{\nu} = 3153 \text{ cm}^{-1}$<br>FWHM = 190 $\text{cm}^{-1}$<br>$I = 697$  |

Lorentzian  
parameters  
second-  
Raman  
graphite,  
GO\_Q.  $\Delta\tilde{\nu}$   
shift/band  
FWHM =  
at half  
 $I = \text{Band}$

**Table S3.** Lorentzian peak fitting parameters for the first-order Raman bands of CNDs, oxCNDs, and oxCNDs\_Q.  $\Delta\tilde{\nu}$  = Raman shift/band position; FWHM = Full width at half maximum;  $I$  = Band intensity.

| Sample   | First-order Raman bands                                                               |                                                                                         |                                                                                        |                                                                                       |                                                                                       |
|----------|---------------------------------------------------------------------------------------|-----------------------------------------------------------------------------------------|----------------------------------------------------------------------------------------|---------------------------------------------------------------------------------------|---------------------------------------------------------------------------------------|
|          | D* (D+D')                                                                             | D                                                                                       | G' (2D)                                                                                | D''                                                                                   | 2G (2D')                                                                              |
| CNDs     | $\Delta\tilde{\nu} = 1232 \text{ cm}^{-1}$<br>FWHM = 448 $\text{cm}^{-1}$<br>$I = 43$ | $\Delta\tilde{\nu} = 1348 \text{ cm}^{-1}$<br>FWHM = 148 $\text{cm}^{-1}$<br>$I = 143$  | $\Delta\tilde{\nu} = 1463 \text{ cm}^{-1}$<br>FWHM = 125 $\text{cm}^{-1}$<br>$I = 44$  | $\Delta\tilde{\nu} = 1572 \text{ cm}^{-1}$<br>FWHM = 57 $\text{cm}^{-1}$<br>$I = 340$ | $\Delta\tilde{\nu} = 1514 \text{ cm}^{-1}$<br>FWHM = 70 $\text{cm}^{-1}$<br>$I = 57$  |
| oxCNDs   | $\Delta\tilde{\nu} = 1130 \text{ cm}^{-1}$<br>FWHM = 158 $\text{cm}^{-1}$<br>$I = 62$ | $\Delta\tilde{\nu} = 1355 \text{ cm}^{-1}$<br>FWHM = 186 $\text{cm}^{-1}$<br>$I = 1221$ | $\Delta\tilde{\nu} = 1524 \text{ cm}^{-1}$<br>FWHM = 120 $\text{cm}^{-1}$<br>$I = 348$ | $\Delta\tilde{\nu} = 1584 \text{ cm}^{-1}$<br>FWHM = 65 $\text{cm}^{-1}$<br>$I = 861$ | $\Delta\tilde{\nu} = 1616 \text{ cm}^{-1}$<br>FWHM = 48 $\text{cm}^{-1}$<br>$I = 871$ |
| oxCNDs_Q | $\Delta\tilde{\nu} = 1225 \text{ cm}^{-1}$<br>FWHM = 338 $\text{cm}^{-1}$<br>$I = 87$ | $\Delta\tilde{\nu} = 1351 \text{ cm}^{-1}$<br>FWHM = 129 $\text{cm}^{-1}$<br>$I = 354$  | $\Delta\tilde{\nu} = 1481 \text{ cm}^{-1}$<br>FWHM = 164 $\text{cm}^{-1}$<br>$I = 121$ | $\Delta\tilde{\nu} = 1584 \text{ cm}^{-1}$<br>FWHM = 80 $\text{cm}^{-1}$<br>$I = 339$ | $\Delta\tilde{\nu} = 1617 \text{ cm}^{-1}$<br>FWHM = 60 $\text{cm}^{-1}$<br>$I = 133$ |

|          |                                                                                             |                                                                                              |                                                                                              |                                                                                              |
|----------|---------------------------------------------------------------------------------------------|----------------------------------------------------------------------------------------------|----------------------------------------------------------------------------------------------|----------------------------------------------------------------------------------------------|
|          | FWHM = 168 cm <sup>-1</sup><br><i>I</i> = 26                                                | FWHM = 64 cm <sup>-1</sup><br><i>I</i> = 379                                                 | FWHM = 386 cm <sup>-1</sup><br><i>I</i> = 37                                                 | FWHM = 63 cm <sup>-1</sup><br><i>I</i> = 20                                                  |
| oxCNDs   | -                                                                                           | $\Delta\tilde{\nu}$ = 2704 cm <sup>-1</sup><br>FWHM = 427 cm <sup>-1</sup><br><i>I</i> = 270 | $\Delta\tilde{\nu}$ = 2946 cm <sup>-1</sup><br>FWHM = 310 cm <sup>-1</sup><br><i>I</i> = 304 | $\Delta\tilde{\nu}$ = 3185 cm <sup>-1</sup><br>FWHM = 164 cm <sup>-1</sup><br><i>I</i> = 113 |
| oxCNDs_Q | $\Delta\tilde{\nu}$ = 2469 cm <sup>-1</sup><br>FWHM = 175 cm <sup>-1</sup><br><i>I</i> = 29 | $\Delta\tilde{\nu}$ = 2692 cm <sup>-1</sup><br>FWHM = 124 cm <sup>-1</sup><br><i>I</i> = 137 | $\Delta\tilde{\nu}$ = 2919 cm <sup>-1</sup><br>FWHM = 254 cm <sup>-1</sup><br><i>I</i> = 74  | $\Delta\tilde{\nu}$ = 3142 cm <sup>-1</sup><br>FWHM = 130 cm <sup>-1</sup><br><i>I</i> = 15  |

**Table S4.** Lorentzian peak fitting parameters for the second-order Raman bands of CNDs, oxCNDs, and oxCNDs\_Q.  $\Delta\tilde{\nu}$  = Raman shift/band position; FWHM = Full width at half maximum; *I* = Band intensity.

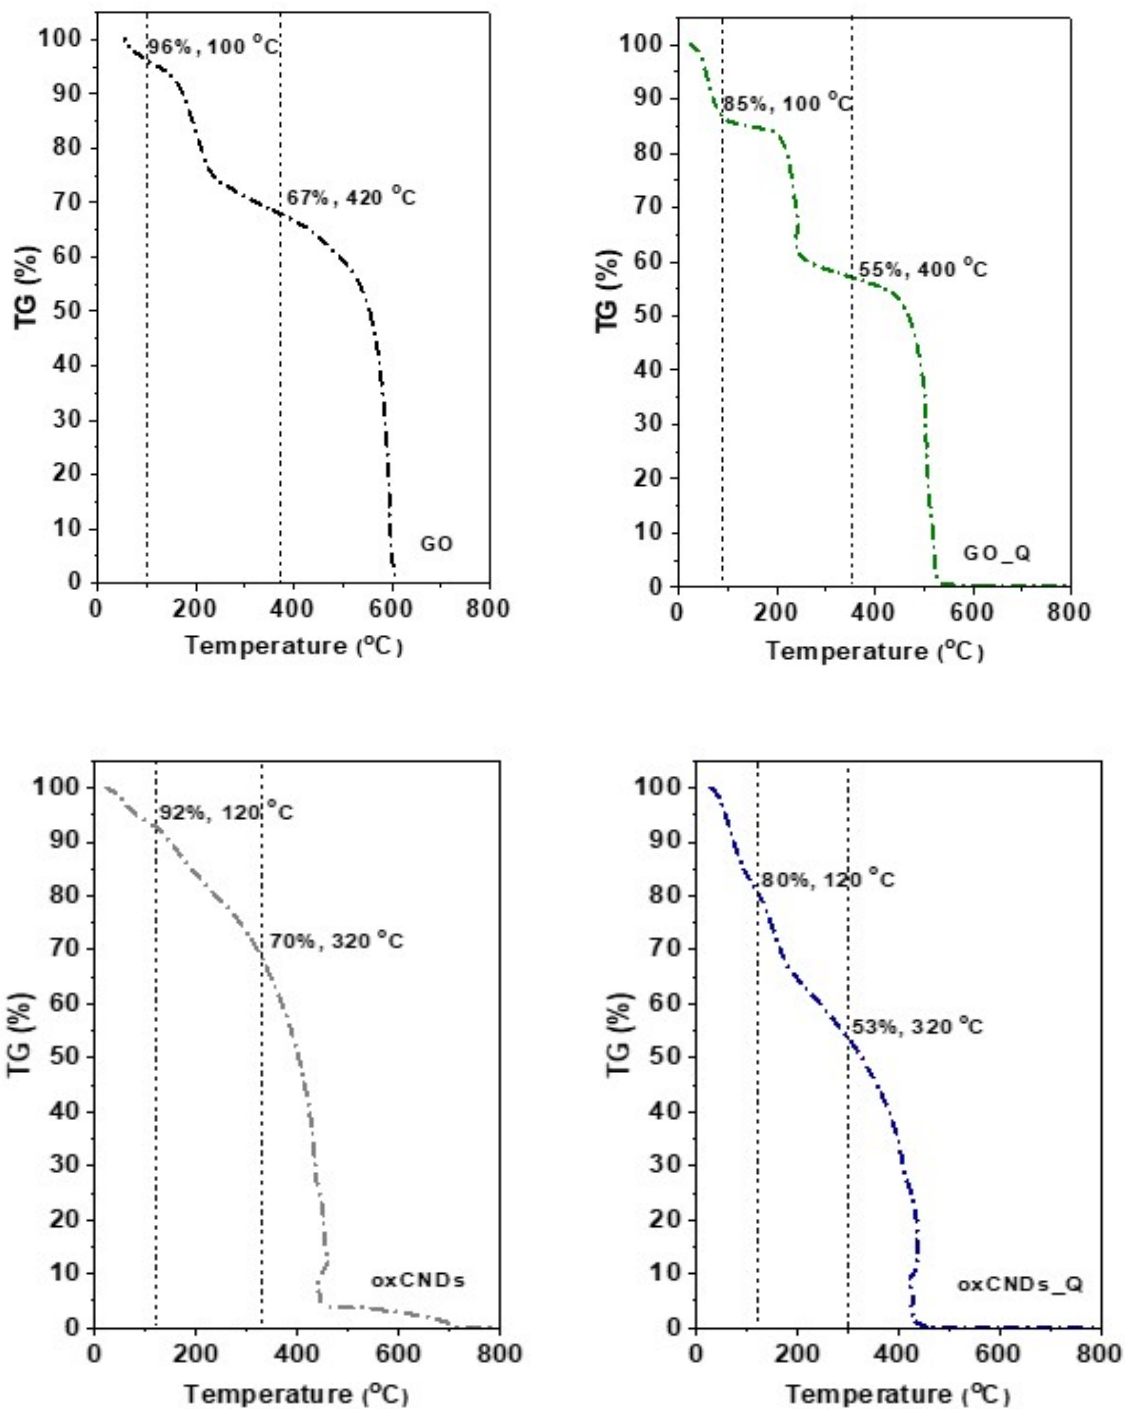

**Figure S1.** TGA thermographs of GO, GO\_Q, oxCNDs and oxCNDs\_Q.

UV-Vis spectra were collected on a Shimadzu UV-2401PC two-beam spectrophotometer in the range of 200–800 nm, with steps of 0.5 nm, using a combination of deuterium and halogen lamps as sources.

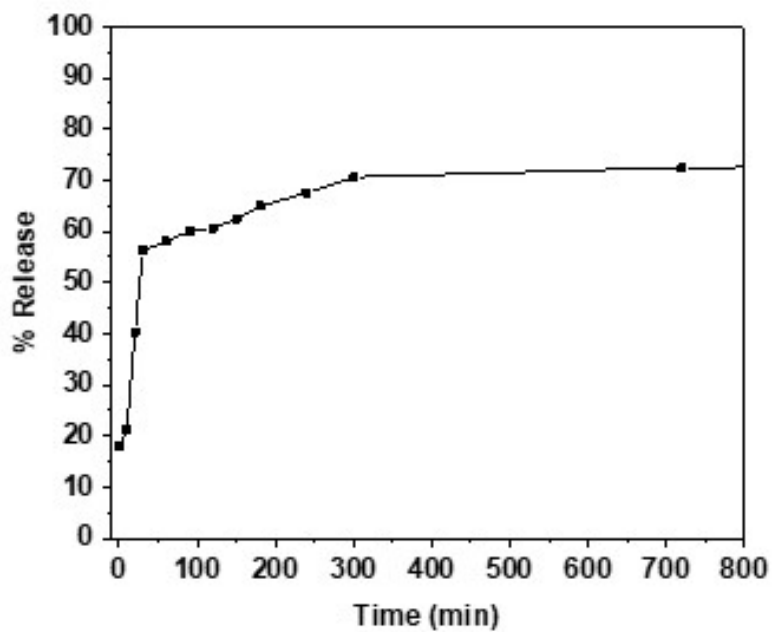

**Figure S2.** Release profile of oxCNDs\_Q
